# Supplementary material for: Assimilation of multiple different datasets results in large differences in regional to global-scale NEE and GPP budgets simulated by a terrestrial biosphere model
Source: Copernicus journal article supplement (doi:10.5194/bg-2022-109), 2022-05-31
Supplement: Supplementary file 1 [file bg-2022-109-supplement-version3.pdf]

---

1  
2 **Supplementary Information for “Assimilation of multiple datasets results in large differences**  
3 **in regional to global-scale NEE and GPP budgets simulated by a terrestrial biosphere model”**

4  
5 **Bacour C., MacBean N., Chevallier F., Léonard S., Koffi E.N., Peylin P.**

6  
7 **Supplementary Text S1: Data assimilation experiments: differences with the stepwise approach**

8 Although the stepwise assimilation has been extended to ten years of atmospheric CO<sub>2</sub> data (compared  
9 to only three years in Peylin et al. (2016)), there are few differences in the experimental set-up  
10 compared to the DA experiments considered in the present study: *i*) the set of optimized parameters is  
11 not strictly identical: the stepwise study did not optimize the parameters controlling the maximum LAI  
12 value per PFT nor the root profile, which are included in this study, but instead did include two  
13 additional parameters, one controlling the albedo of vegetation and the other reducing the hydric  
14 limitation of photosynthesis, which are not considered here; *ii*) for optimization of the phenology using  
15 satellite NDVI data, the C4 grass PFT was calibrated in Peylin et al. (2016), which is not the case in this  
16 study (MacBean et al., (2015) found that phenology for semi-arid PFTs was not well captured by the  
17 model and further improvements to the phenology schemes for these PFTs are needed); *iii*) the  
18 selection of the eddy-covariance sites is more selective in the present study (a few sites for which the  
19 model-data inconsistency was too important were discarded), which slightly reduces the number of site-  
20 years available for some PFTs; *iv*) finally, the *a priori* errors on model parameters (at the first and second  
21 steps) were set to 40% of the parameter variation range in Peylin et al. (2016), and were hence larger  
22 than what is prescribed in this study as a result of the consistency checks performed in Section 2.3.4.2.

23  
24 **Supplementary Text S2: Processing of atmospheric CO<sub>2</sub> data**

25 In order to analyze the fit to the atmospheric CO<sub>2</sub> concentrations in terms of trend and seasonal cycle  
26 (magnitude and phase), the measured and modeled monthly time series are fitted using the CCGCRV  
27 package (<ftp://ftp.cmdl.noaa.gov/user/thoning/ccgcrv/>) following Thoning et al. (1989). It decomposes  
28 the time series into a first-order polynomial term (that represents the trend) and four harmonics, and  
29 then filters the residuals of that function in frequency space using a low-pass filter (cutoff frequency of  
30 65 days). The seasonal cycle corresponds to the harmonics plus the filtered residuals. For a given time  
31 series, we calculate the magnitude of the seasonal cycle for each year as the difference between the  
32 maximum and minimum value, and the carbon uptake period (CUP) as the sum of the days when the  
33 values of the seasonal cycle extracted from the CO<sub>2</sub> concentration time series are negative (plant  
34 removing CO<sub>2</sub> from the atmosphere by convention) (Peylin et al., 2016). Examples of observed and

35 simulated time series of atmospheric CO<sub>2</sub> concentrations at four sites are provided on Figure S1, as well  
 36 as the corresponding trends derived by CCGCRV.

37

38 **Supplementary Text S3: Consistency diagnostics on the errors**

39 ***Desroziers et al. (2005) tests***

40 Several attempts were performed to specify the errors on model parameters in order to approach this  
 41 goal considering each data-stream independently. With an initial definition of the parameter error  
 42 corresponding to 40% of their variation range, the diagnostics on the **R** matrix, show a strong  
 43 overestimation for all data streams (ratios about 3 for NEE and LE, 2 for NDVI and 12 for atmospheric  
 44 CO<sub>2</sub>), while the diagnostics on **B** were more consistent with ratios slightly higher than 1 but for NDVI  
 45 (2.5). These results led us to revise the definition of **B** by decreasing the error for all parameters such  
 46 that it corresponds to about 20% of the variation range for phenological parameters, and 12% for the  
 47 other parameters (a value close to what was prescribed in Kuppel et al. (2013)).

48

49 ***Reduced chi-square***

50 For all experiments but those involving atmospheric CO<sub>2</sub> measurements, the values of the reduced chi-  
 51 square (after optimization) over all data are below 1 (Table S1), which corroborates the overestimation  
 52 of the model-data and parameter errors observed previously. For fluxes and satellite data, this  
 53 overestimation of the model-data error was expected, and even desired, given that the covariances in **R**  
 54 were neglected by construction (off-diagonal elements set to zero). For CO<sub>2</sub>, the large value of  $\chi^2$   
 55 expresses a strong underestimation of the observation error not highlighted by the consistency  
 56 diagnostics. Indeed, when determining **R**<sub>CO<sub>2</sub></sub>, we purposely did not account for the structural error in  
 57 ORCHIDEE that largely explains the strong bias between observed and simulated CO<sub>2</sub> temporal profiles  
 58 by about 1 ppm.yr<sup>-1</sup>. This underestimation is even inflated in the joint assimilation experiments, even  
 59 though the reduced chi-square over all data remains close to 1.

60

| experiment      | Data - stream |      |       |          |
|-----------------|---------------|------|-------|----------|
|                 | F             | VI   | CO2   | all data |
| F               | 0.91          |      |       | 0.91     |
| VI              |               | 0.78 |       | 0.78     |
| CO2             |               |      | 8.57  | 8.57     |
| F+VI            | 0.95          | 0.50 |       | 0.73     |
| F+CO2           | 0.97          |      | 11.56 | 1.4      |
| VI+CO2          |               | 0.74 | 11.72 | 1.18     |
| F+VI+CO2        | 0.99          | 0.75 | 11.3  | 1.09     |
| F+VI+CO2-2steps | 0.96          | 0.67 | 7.88  | 0.97     |

61 **Table S1: Values of the reduced chi-square determined after model calibration for the various assimilation**

62 experiments, for each data-stream.

63

#### 64 **Supplementary Text S4: Optimisation performances**

65 All optimizations but two (F and VI) reached a pre-defined maximum number of iterations (set to 35 for  
66 L-BFGS-B), therefore causing a hard stopping of the optimization (cf, Table S2, which also provides the  
67 values of the misfit functions for all assimilation experiments, relative to the background and to the  
68 observations). For the last iterations however, the variations of the misfit functions were low in all these  
69 cases, indicating that the final iterations were close to the minimum. The comparison between the  
70 observation and parameter terms of the posterior cost function shows how the total cost function is  
71 dominated by the weight of the model-data misfit.

72 The highest rate of change of the total cost function related to the observation term is obtained for the  
73 CO<sub>2</sub> assimilation with a reduction of the misfit between model outputs and measurements by about 46.  
74 This is directly related to the correction of the large bias in the prior model with carbon pools at  
75 equilibrium relative to the prescribed prior error. Noticeably, the strong model improvement reached  
76 for CO<sub>2</sub> comes with only a small variation in the model parameters as depicted by the posterior value of  
77  $J_b$ . For the assimilation of the fluxes and satellite data alone (F and VI respectively), the model  
78 improvement is smaller, about 1.1, but shows a stronger departure of the parameters from their prior  
79 values compared to CO<sub>2</sub> (Figure 3). The ratio of the norm of the gradient of the misfit function is also  
80 the highest for the CO<sub>2</sub> experiment. On the opposite, it is slightly lower than one for VI which may  
81 indicate a possible issue of convergence towards the solution.

82

83 The two-step approach for the assimilation involving the three data-streams results in an enhanced  
84 agreement of the model with all data as compared to the one-step optimization. In parallel, the change  
85 in parameter values (departure from the background) is also higher for the two-step approach (Figure 3).

86

| experiment                   | Number of iterations | Jo prior | Jo post | Jo prior/ Jo post (obs part) | Jo(F) post | Jo(CO <sub>2</sub> ) post | Jb post | Ratio norm grad J (prior/post) |
|------------------------------|----------------------|----------|---------|------------------------------|------------|---------------------------|---------|--------------------------------|
| F                            | 34                   | 75396    | 68305   | 1.10                         | 68305      |                           | 117.6   | 3.95                           |
| VI                           | 29                   | 65696    | 58517   | 1.12                         |            |                           | 37.9    | 0.94                           |
| CO <sub>2</sub>              | 35                   | 1256783  | 27238   | 46.14                        |            | 27238                     | 7.8     | 759.5                          |
| F+VI                         | 35                   | 142118   | 108961  | 1.30                         | 71353      |                           | 79.3    | 0.97                           |
| F+CO <sub>2</sub>            | 35                   | 1332190  | 109994  | 12.11                        | 73232      | 36763                     | 1.05    | 27.7                           |
| VI+CO <sub>2</sub>           | 35                   | 1323494  | 92543   | 14.30                        |            | 37257                     | 1.3     | 132.3                          |
| F+VI+CO <sub>2</sub>         | 35                   | 1398901  | 166797  | 8.39                         | 74435      | 35918                     | 1.6     | 168.7                          |
| F+VI+CO <sub>2</sub> -2steps | 35                   | 1398901  | 148206  | 9.43                         | 72654      | 25002                     | 44.6    | -                              |

87 **Table S2: Characteristics of the various assimilation experiments: number of iterations, value of the cost**  
88 **functions related to the observation (Jo) and parameter terms (Jb) prior and posterior to the assimilation (as**  
89 **well as ratio of the posterior to prior values for Jo), ratio of norm of the gradient of the misfit functions (prior vs**

---

90 posterior).

91

92

93 **Supplementary Text S5: Analysis of the reduction of the model-data misfit**

94 ***Mono-data stream assimilations***

95 The increased consistency between model and flux data achieved after assimilation of F data is usually  
96 higher for NEE (median RMSD reduction of 10.4%, ranging from -69% to 38%) than for LE (0.3%; -42% /  
97 28% range). This is largely explained by the higher number of optimized parameters related to the  
98 carbon cycle relative to the water cycle, and by the optimization of the multiplicative factor of the soil  
99 carbon pools that corrects the bias in the ecosystem respiration inherent to the model spin-up  
100 (Carvalho et al., 2010; Kuppel et al. 2012). The strong model improvement for FAPAR in the VI  
101 assimilation (22.2% median; -32% / 36% range) follows a strong decrease of the simulated growing  
102 season length for deciduous PFTs in better accordance with the satellite observations, as discussed in  
103 MacBean et al. (2015). It mainly results from an earlier senescence for the several PFTs while the change  
104 of leaf onset depends on the type of vegetation. Both for the F and VI experiments, the reduction of the  
105 model-data misfit can be negative for some sites/pixels. This reflects how the assimilation may degrade  
106 the model performance at some sites/pixels by seeking for a common parameter set. This is not  
107 observed for atmospheric CO<sub>2</sub> data for which the optimized model is always closer to the observations  
108 than the prior model at all stations. Assimilating atmospheric CO<sub>2</sub> concentration measurements corrects  
109 the strong overestimation of the prior model (as also described in Peylin et al. (2016)), with a median  
110 RMSD reduction of 76% (ranging from 10% at HUN to 90% at SPO). This improvement corresponds to an  
111 increase of the net land carbon sink at the global scale in order to correct the strong mismatch between  
112 the observed trend and the *a priori* model. It is mainly realized by the optimization of the multiplicative  
113 factor of the soil carbon pools. As seen in Figure 2 from the detrended seasonal cycles of atmospheric  
114 CO<sub>2</sub> data (light red box), the changes in the modelled amplitude and phasing is smaller but still in better  
115 agreement with the observed data (median value of RMSD reduction of 14.4%; -21% / 55% range).

116

117 ***Multiple-data stream assimilations***

118 The simultaneous assimilation of flux measurements and satellite NDVI data leads to enhanced model  
119 improvement as compared to when these data are assimilated alone: the median RMSD reductions are  
120 10.8% for NEE (10.4% in the F case) and 36.7% for FAPAR/NDVI (22.2% in the VI case). In the  
121 simultaneous assimilations involving atmospheric CO<sub>2</sub> data, the most of the model improvement is  
122 attributed to CO<sub>2</sub> while the benefit relative to fluxes and FAPAR/NDVI is weak: for NEE, the median  
123 RMSD reductions are only of 2.5% and 2.6% in the F+CO<sub>2</sub> and F+VI+CO<sub>2</sub> cases (as compared to 10% in  
124 the F case); for FAPAR, the median values are 1.2% and 1.4% for the VI+CO<sub>2</sub> and F+VI+CO<sub>2</sub> experiments

---

125 (22% in the VI case).  
126 The 2-steps assimilation F+VI+CO<sub>2</sub> results in a higher model improvement regarding both NEE and  
127 FAPAR (respectively 5.5% and 11.2%) than the one-step approach.  
128 Regarding the raw atmospheric CO<sub>2</sub> data, the median improvements are 76.1% for CO<sub>2</sub>, 76.3% for  
129 F+CO<sub>2</sub>, 73.6% for VI+CO<sub>2</sub>, 72.9% for F+VI+CO<sub>2</sub> and only 25.6% for F+VI+CO<sub>2</sub>-2steps.  
130 More pronounced differences between experiments are obtained for the de-trended CO<sub>2</sub> time series:  
131 while the median RMSD reduction is of 14% in the CO<sub>2</sub> experiment, it is decreased to 7.8% in F+CO<sub>2</sub>,  
132 8.4% in VI+CO<sub>2</sub>, and 10.6% in F+VI+CO<sub>2</sub>; at the opposite the RMSD reduction is increased to 15.4% in  
133 F+VI+CO<sub>2</sub>-2steps.

134

### 135 **Supplementary Text S6: Global budget and uncertainty reduction**

136 For NEE, the global scale budget is about -2.4 GtC.yr<sup>-1</sup> for all experiments using atmospheric CO<sub>2</sub> as a  
137 constraint: the lower value of -2.28 GtC.yr<sup>-1</sup> is found for F+CO<sub>2</sub>; the higher values of -2.49GtC.yr<sup>-1</sup> and -  
138 2.48 GtC.yr<sup>-1</sup> are obtained for CO<sub>2</sub> / F+VI+CO<sub>2</sub>-2steps.

139 In the northern and southern hemispheres, the CO<sub>2</sub> assimilation results in the largest C sinks (-1.65 / -  
140 0.04 GtC.yr<sup>-1</sup> for NH/SH) while the 2step assimilation induces the lowest one (-0.41 / 0.003 GtC.yr<sup>-1</sup>); the  
141 opposite result is obtained in the southern hemisphere with lower (-0.79 GtC.yr<sup>-1</sup>) / higher (-2.06 GtC.yr<sup>-1</sup>)  
142 budgets found for CO<sub>2</sub> / F+VI+CO<sub>2</sub>-2steps.

143 The reduction of the global scale GPP budget is respectively of -19.61 GtC.yr<sup>-1</sup> and -17.91 GtC.yr<sup>-1</sup> for the  
144 F and VI experiments, which correspond to the largest corrections obtained among the various  
145 assimilations considered.

146 The averaged change in GPP is about -7.33 GtC.yr<sup>-1</sup> globally for the CO<sub>2</sub> assimilation experiment. The  
147 corrections for the joint assimilations involving CO<sub>2</sub> data is even lower: the mean global change are -  
148 1.07 GtC.yr<sup>-1</sup> for VI+CO<sub>2</sub>, -1.35 GtC.yr<sup>-1</sup> for F+CO<sub>2</sub> and -1.98 GtC.yr<sup>-1</sup> for F+VI+CO<sub>2</sub>. For the F+VI+CO<sub>2</sub> 2-  
149 step experiment, the constraint on GPP is close to that obtained when CO<sub>2</sub> data are assimilated alone (-  
150 7.70 GtC.yr<sup>-1</sup>).

151

152 For the joint assimilations, the posterior errors on NEE is about 0.9 GtC.yr<sup>-1</sup> globally and about 0.3  
153 GtC.yr<sup>-1</sup> for the three regions considered. The lowest posterior errors on GPP are obtained for the two  
154 experiments that combine the three data streams (about 0.09 GtC.yr<sup>-1</sup> at the global scale, and about  
155 0.04 GtC.yr<sup>-1</sup> depending on the region). The values are close to the ones obtained with F+CO<sub>2</sub>.

156

---

157 **Supplementary Text S7: Relative constraints brought by the different datasets with respect to PFTs**

158 **and atmospheric stations**

159 We performed the analysis of the influence of each data stream by discriminating the influence of each  
160 PFT for flux and satellite data, and each station for atmospheric CO<sub>2</sub> concentrations (Figure S3 -  
161 experiment F+VI+CO<sub>2</sub>). For the flux data, the results are mainly proportional to the number of  
162 observations available (hence, the lower results are obtained for BorDBF, TeDBF and TrEBF, for which  
163 the number of assimilated data is about one order of magnitude lower than for the other PFTs; see §  
164 2.2.1).

165 For satellite NDVI data however, the number of data is the same for each PFT. The discrepancies  
166 between PFTs is thus less pronounced than for flux data and related to the ability of the selected  
167 parameters to correct the phenology of each PFTs (constrained by the NDVI data). For TrDBF and C3GRA,  
168 the inability to correct the start of the growing season (Kpheno,crit, remains close to the prior values, as  
169 seen in Figure 3) may explain the lower contribution of these PFTs.

170 For atmospheric CO<sub>2</sub> data, the DFS is relatively well distributed across stations, with a mean value of 1.9  
171 (range 0.19 – 14.5), in particular in the northern hemisphere. The higher values are found for a few  
172 southern hemisphere stations: Halley Station - HBA (6), Syowa - SYO (8.4), South Pole - SPO (11.9) and  
173 Cap Grim Observatory - CGO (14.5). Possible reasons for their larger impact may combine: a strong *a*  
174 *priori* model-data mismatch that is substantially corrected, ocean-driven concentration variations not  
175 well captured by the prescribed ocean flux but incidentally well corrected by remote land fluxes, etc.

176

| Name                           | TropEBF <sup>F</sup>                    | TropBRF <sup>VI</sup>                   | TempENF <sup>F</sup>                    | TempEBF <sup>F</sup>                | TempDBF <sup>F,VI</sup>                | BorENF <sup>F</sup>                     | BorDBF <sup>F,VI</sup>                 | BorDNF <sup>VI</sup>                   | C3Grass <sup>F,VI</sup>                |
|--------------------------------|-----------------------------------------|-----------------------------------------|-----------------------------------------|-------------------------------------|----------------------------------------|-----------------------------------------|----------------------------------------|----------------------------------------|----------------------------------------|
| <i>Photosynthesis</i>          |                                         |                                         |                                         |                                     |                                        |                                         |                                        |                                        |                                        |
| <b>V<sub>cmax</sub></b>        | 65<br>[35;95]<br><i>10</i>              | 65<br>[35;95]<br><i>10</i>              | 35<br>[19;51]<br><i>5.3</i>             | 45<br>[25;65]<br><i>6.7</i>         | 55<br>[30;80]<br><i>8.3</i>            | 35<br>[19;51]<br><i>5.3</i>             | 45<br>[25;65]<br><i>6.7</i>            | 35<br>[19;51]<br><i>5.3</i>            | 70<br>[38;102]<br><i>10.7</i>          |
| <b>G<sub>s,slope</sub></b>     | 9<br>[6;12]<br><i>1</i>                 | 9<br>[6;12]<br><i>1</i>                 | 9<br>[6;12]<br><i>1</i>                 | 9<br>[6;12]<br><i>1</i>             | 9<br>[6;12]<br><i>1</i>                | 9<br>[6;12]<br><i>1</i>                 | 9<br>[6;12]<br><i>1</i>                | 9<br>[6;12]<br><i>1</i>                | 9<br>[6;12]<br><i>1</i>                |
| <b>T<sub>opt</sub></b>         | 37<br>[29;45]<br><i>2.7</i>             | 37<br>[29;45]<br><i>2.7</i>             | 25<br>[17;33]<br><i>2.7</i>             | 32<br>[24;40]<br><i>2.7</i>         | 26<br>[18;34]<br><i>2.7</i>            | 25<br>[17;33]<br><i>2.7</i>             | 25<br>[17;33]<br><i>2.7</i>            | 25<br>[17;33]<br><i>2.7</i>            | 27.25<br>[19.2;35.2]<br><i>2.7</i>     |
| <b>SLA</b>                     | 0.0154<br>[0.007;0.03]<br><i>0.0038</i> | 0.0260<br>[0.013;0.05]<br><i>0.0062</i> | 0.0093<br>[0.004;0.02]<br><i>0.0027</i> | 0.02<br>[0.01;0.04]<br><i>0.005</i> | 0.026<br>[0.013;0.05]<br><i>0.0062</i> | 0.0093<br>[0.004;0.02]<br><i>0.0027</i> | 0.026<br>[0.013;0.05]<br><i>0.0062</i> | 0.019<br>[0.009;0.04]<br><i>0.0052</i> | 0.026<br>[0.013;0.05]<br><i>0.0062</i> |
| <i>Soil water availability</i> |                                         |                                         |                                         |                                     |                                        |                                         |                                        |                                        |                                        |
| <b>H<sub>um,cste</sub></b>     | 0.8<br>[0.2;3]<br><i>0.47</i>           | 0.8<br>[0.2;3]<br><i>0.47</i>           | 1<br>[0.25;4]<br><i>0.62</i>            | 0.8<br>[0.2;3]<br><i>0.47</i>       | 0.8<br>[0.2;3]<br><i>0.47</i>          | 1<br>[0.25;4]<br><i>0.62</i>            | 1<br>[0.25;4]<br><i>0.62</i>           | 0.8<br>[0.2;3]<br><i>0.47</i>          | 4<br>[1;10]<br><i>1.5</i>              |
| <i>Phenology</i>               |                                         |                                         |                                         |                                     |                                        |                                         |                                        |                                        |                                        |
| <b>LAI<sub>MAX</sub></b>       | 7<br>[4;10]<br><i>1</i>                 | 7<br>[4;10]<br><i>1</i>                 | 5<br>[3;8]<br><i>0.8</i>                | 5<br>[3;8]<br><i>0.8</i>            | 5<br>[3;8]<br><i>0.8</i>               | 4.5<br>[2.5;6.5]<br><i>0.7</i>          | 4.5<br>[2.5;6.5]<br><i>0.7</i>         | 3<br>[1.5;4.5]<br><i>0.5</i>           | 2.5<br>[1.5;3.5]<br><i>0.3</i>         |
| <b>K<sub>pheno,crit</sub></b>  |                                         | 1<br>[0.7; 1.8]<br><i>0.18</i>          |                                         |                                     | 1<br>[0.7; 1.8]<br><i>0.18</i>         |                                         | 1<br>[0.7; 1.8]<br><i>0.18</i>         | 1<br>[0.7; 1.8]<br><i>0.18</i>         | 1<br>[0.7; 1.8]<br><i>0.18</i>         |
| <b>T<sub>senes</sub></b>       |                                         |                                         |                                         |                                     | 12<br>[2;22]<br><i>3.3</i>             |                                         | 7<br>[-3;17]<br><i>3.3</i>             | 2<br>[-8;12]<br><i>3.3</i>             | -1.375<br>[-11.4;9.4]<br><i>3.5</i>    |
| <b>L<sub>age,crit</sub></b>    | 730<br>[490;970]<br><i>80</i>           | 180<br>[120;240]<br><i>20</i>           | 910<br>[610;1210]<br><i>100</i>         | 730<br>[490;970]<br><i>80</i>       | 180<br>[90;240]<br><i>25</i>           | 910<br>[610;1210]<br><i>100</i>         | 180<br>[90;240]<br><i>27.5</i>         | 180<br>[90;240]<br><i>27.5</i>         | 120<br>[30;180]<br><i>25</i>           |
| <b>K<sub>LAI,happy</sub></b>   | 0.5<br>[0.35;0.7]<br><i>0.06</i>        | 0.5<br>[0.35;0.7]<br><i>0.06</i>        | 0.5<br>[0.35;0.7]<br><i>0.06</i>        | 0.5<br>[0.35;0.7]<br><i>0.06</i>    | 0.5<br>[0.35;0.7]<br><i>0.06</i>       | 0.5<br>[0.35;0.7]<br><i>0.06</i>        | 0.5<br>[0.35;0.7]<br><i>0.06</i>       | 0.5<br>[0.35;0.7]<br><i>0.06</i>       | 0.5<br>[0.35;0.7]<br><i>0.06</i>       |
| <i>Respiration</i>             |                                         |                                         |                                         |                                     |                                        |                                         |                                        |                                        |                                        |
| <b>Q10</b>                     |                                         |                                         |                                         |                                     | 1.9937<br>[1;3]<br><i>0.33</i>         |                                         |                                        |                                        |                                        |
| <b>HR<sub>H,c</sub></b>        |                                         |                                         |                                         |                                     | -0.29<br>[-0.59;0.01]<br><i>0.1</i>    |                                         |                                        |                                        |                                        |
| <b>MR<sub>c</sub></b>          |                                         |                                         |                                         |                                     | 1<br>[0.5;2]<br><i>0.25</i>            |                                         |                                        |                                        |                                        |
| <b>K<sub>soilC,site</sub></b>  |                                         |                                         |                                         |                                     | 1<br>[0.5;2]<br><i>0.1</i>             |                                         |                                        |                                        |                                        |
| <b>K<sub>soilC,reg</sub></b>   |                                         |                                         |                                         |                                     | 1<br>[0.7;1.3]<br><i>0.1</i>           |                                         |                                        |                                        |                                        |

177 **Table S3: Prior value, interval of variation (in square brackets) and 1-sigma prior error (italic), of the optimized**  
178 **parameter. Except for those related to respiration, all parameters are PFT-dependent. The exponents F and VI**  
179 **associated to each PFT name indicate the availability of flux (F) and satellite (VI) data.**

180

181

182  
183  
184  
185  
186  
187  
188

**Figure S1: Monthly mean atmospheric CO<sub>2</sub> concentrations, for four stations (Mace Head - MHD (Ireland), Mauna Loa - MLO (Hawaii, USA) , Ryori - RYO (Japan), South Pole - SPO (Antarctic, USA)) over the period 2000–2009. The prior (blue) and the posterior (orange) model simulations are compared to the observations (black), and the corresponding RMSD is provided. The observation error is in grey. The dash lines correspond to the trend derived from the CCGCRV algorithm.**

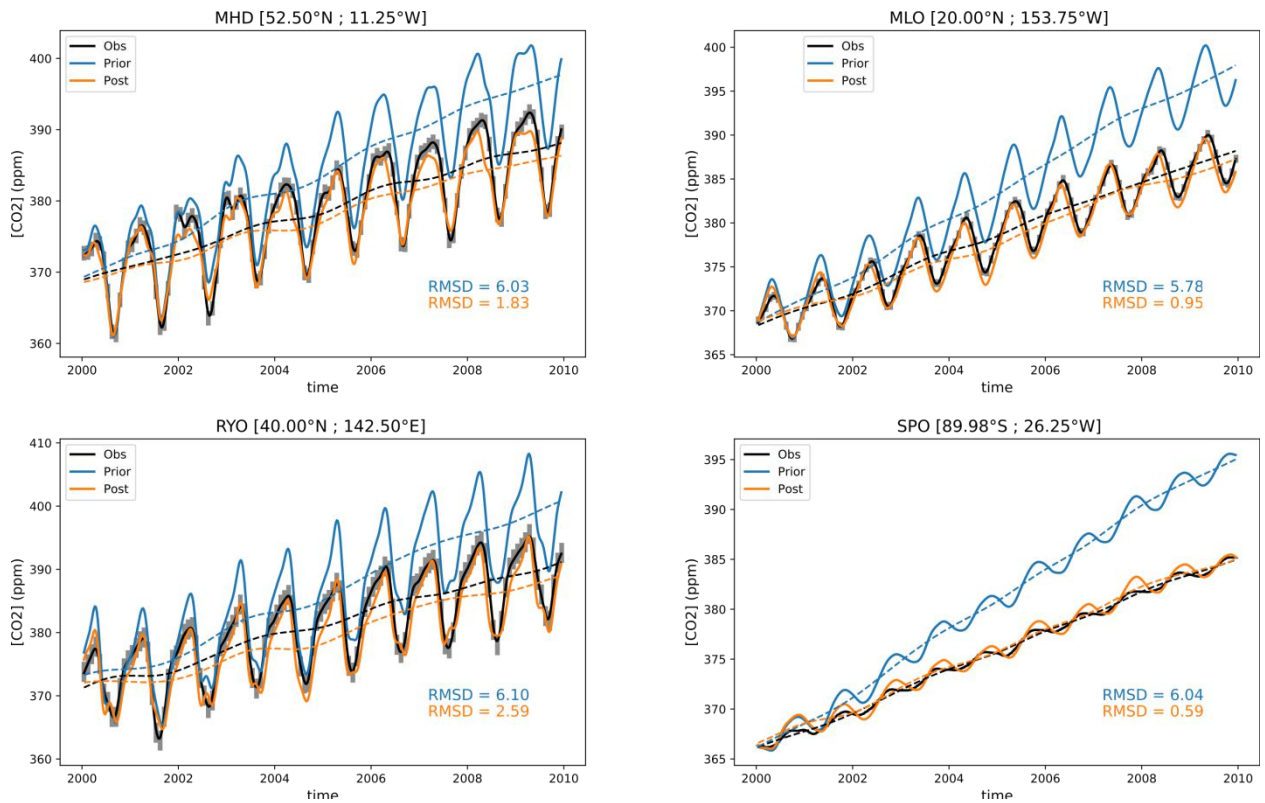

189  
190  
191



192 **Figure S2: Prior and posterior parameter values and uncertainties for a set of optimized parameters (eight PFT-**  
 193 **dependent parameters). The prior value is shown as the horizontal black line and the prior uncertainty (standard**  
 194 **deviation) as the gray area encompassing it along the x-axis. For the PFT-dependent parameters, each box**  
 195 **corresponds to a given PFT; empty boxes indicate that this parameter was not constrained for the corresponding**  
 196 **PFTs. The white zone (non-dashed area) corresponds to the allowed range of variation. The optimized values are**  
 197 **provided for each assimilation experiment ; the corresponding posterior errors are displayed as the vertical bars.**  
 198 **Note that the prior values presented here are those used in this study, and not those of the stepwise (which are**  
 199 **higher/lower for the photosynthesis and respiration / phenological parameters). For each assimilation**  
 200 **experiment is also provided the uncertainty reduction (right y-axis) as the thick opaque horizontal bars.**  
 201

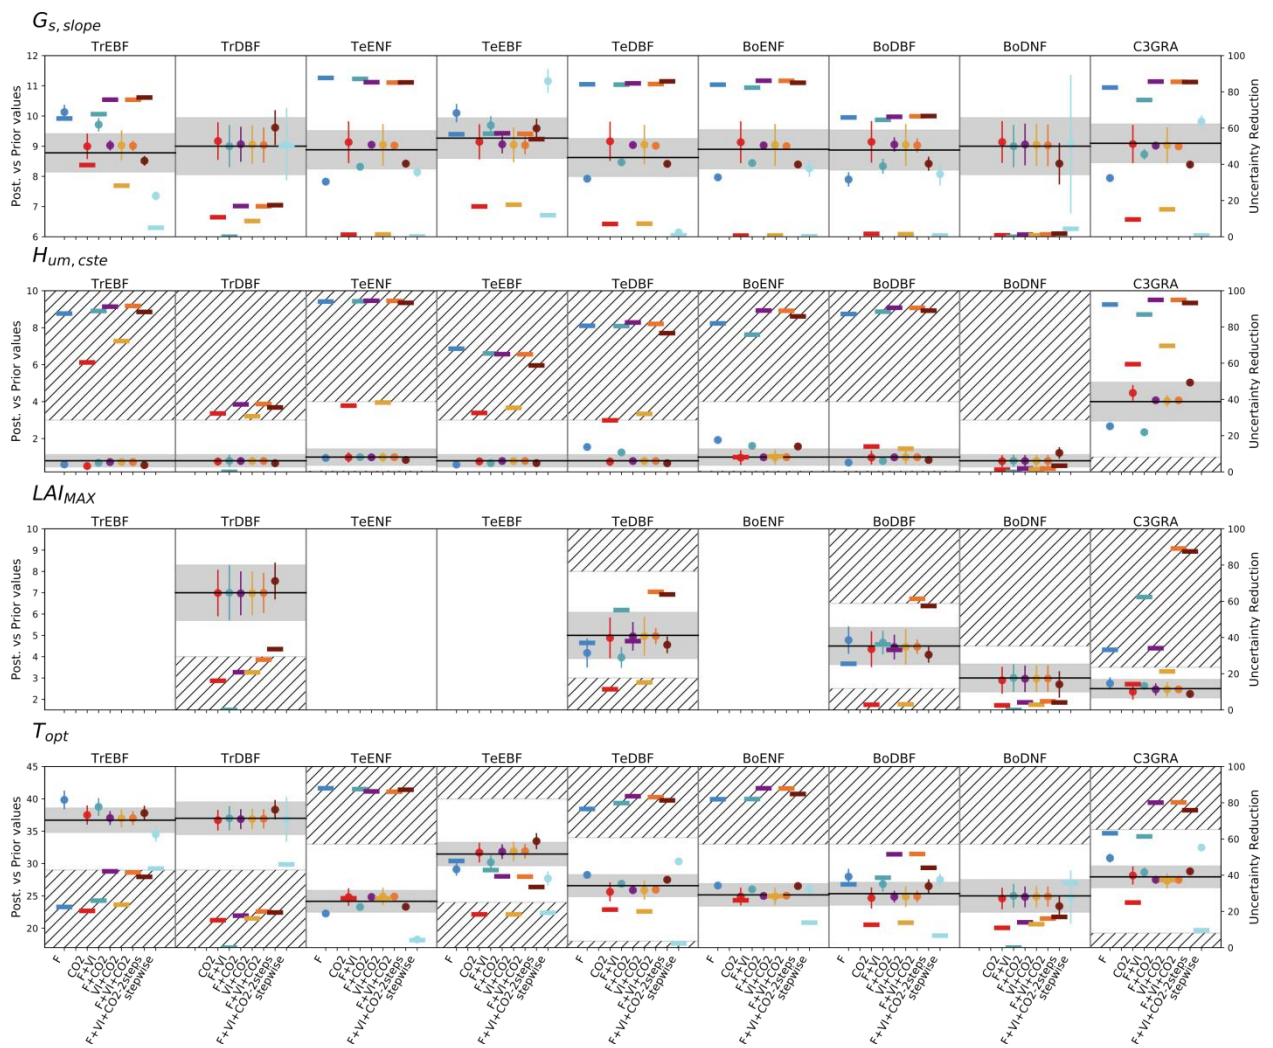

202  
 203  
 204

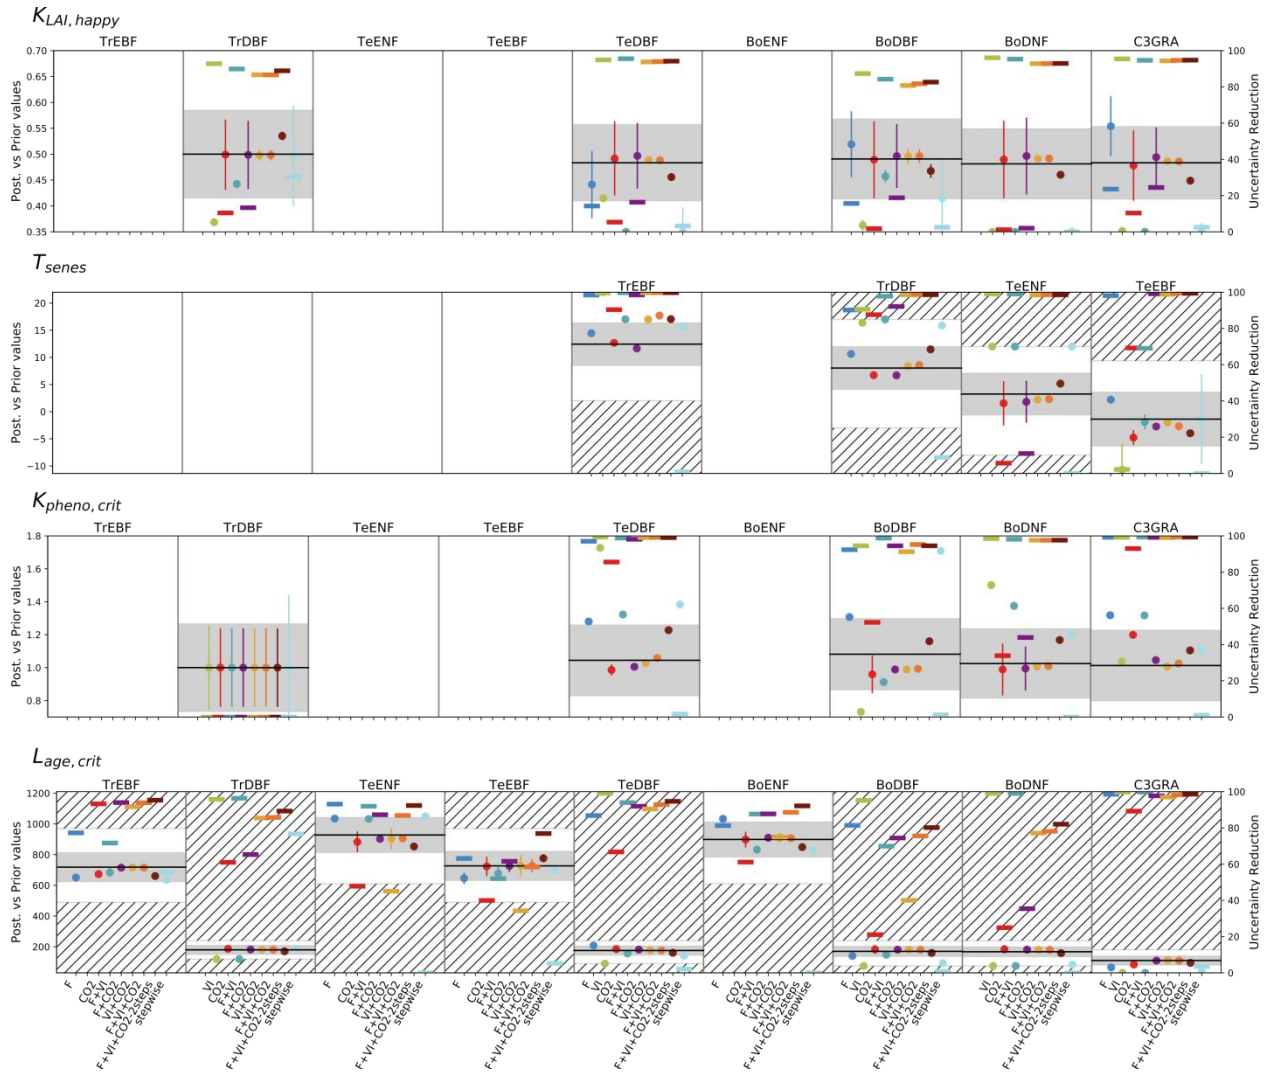

205  
 206  
 207  
 208 **Figure S3: Relative DFS for the F+VI+CO2 assimilation experiment. For Flux and Satellite data: relative DFS per**  
 209 **PFT; for atmospheric CO<sub>2</sub> data: relative relative DFS (contribution) of the different stations to the fit.**

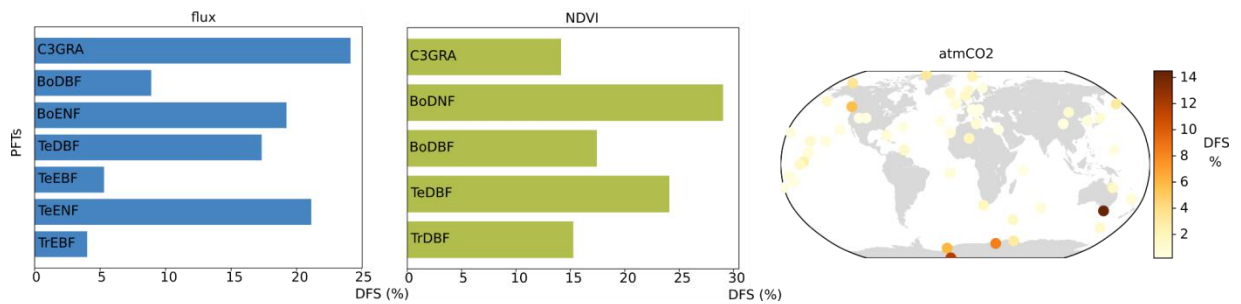

210  
 211  
 212  
 213  
 214

---

215  
216  
217  
218  
219  
220  
221  
222  
223  
224  
225  
226  
227  
228  
229  
230  
231  
232  
233  
234  
235

## References

- Carvalhais, N., Reichstein, M., Ciais, P., Collatz, G. J., Mahecha, M. D., Montagnani, L., et al.: Identification of vegetation and soil carbon pools out of equilibrium in a process model via eddy covariance and biometric constraints. *Global Change Biology*, 16(10), 2813–2829, 2010.
- Kuppel, S., Chevallier, F., & Peylin, P.: Quantifying the model structural error in carbon cycle data assimilation systems, *Geosci. Model Dev.*, 6, 45–55, doi: 10.5194. gmd-6-45-2013, 2013.
- Kuppel, Sylvain, Peylin, P., Chevallier, F., Bacour, C., Maignan, F., & Richardson, A. D.: Constraining a global ecosystem model with multi-site eddy-covariance data. *Biogeosciences*, 9(10), 3757–3776, 2012.
- MacBean, N., Maignan, F., Peylin, P., Bacour, C., Bréon, F.-M., & Ciais, P.: Using satellite data to improve the leaf phenology of a global terrestrial biosphere model. *Biogeosciences*, 12(23), 7185–7208, 2015.
- Peylin, P., Bacour, C., MacBean, N., Leonard, S., Rayner, P., Kuppel, S., et al.: A new stepwise carbon cycle data assimilation system using multiple data streams to constrain the simulated land surface carbon cycle. *Geoscientific Model Development (Online)*, 9(9), 2016.
- Thoning, K. W., Tans, P. P., & Komhyr, W. D.: Atmospheric carbon dioxide at Mauna Loa Observatory: 2. Analysis of the NOAA GMCC data, 1974–1985. *Journal of Geophysical Research: Atmospheres*, 94(D6), 8549–8565, 1989.
